# Supplementary material for: ZC3H12A Expression in Different Stages of Colorectal Cancer
Source: PubMed Central journal article supplement (PMC6508193; doi:10.18632/oncoscience.480), 2019-04-02
Supplement: oncoscience-06-301-s001.pdf [file oncoscience-06-301-s001.pdf]

## SUPPLEMENTARY MATERIALS

**Supplementary Table 1.** Significantly higher gene expression list in Stage I patients as compared to the other groups of patients.

| I vs II  |          | I vs III  |          | I vs IV   |          | I vs II/III/IV combined |           |
|----------|----------|-----------|----------|-----------|----------|-------------------------|-----------|
| Gene     | P value  | Gene      | P value  | Gene      | P value  | Gene                    | P value   |
| ALG8     | 1.22E-04 | TNFRSF10C | 6.68E-05 | CIITA     | 4.71E-05 | ZC3H12A                 | 1.30E-05  |
| PPT2     | 1.97E-04 | ZC3H12A   | 8.34E-05 | LAP3      | 6.41E-05 | ZNF599                  | 0.0002452 |
| ANKS1A   | 2.55E-04 | ALPK1     | 3.33E-04 | LOC165186 | 6.49E-05 | BTBD6                   | 0.0005632 |
| ZNF689   | 2.64E-04 | BTBD6     | 4.30E-04 | GBP4      | 6.61E-05 | SE1L3                   | 0.0005938 |
| ZNF599   | 3.50E-04 | DDX5      | 4.66E-04 | WARS      | 8.55E-05 | SFRS11                  | 0.0007216 |
| TEAD3    | 3.90E-04 | MGC16169  | 5.05E-04 | CYB5D1    | 1.00E-04 | IL17A                   | 0.0007663 |
| KIAA1505 | 4.64E-04 | WRN       | 6.86E-04 | GNLY      | 1.02E-04 | TRBV3-1                 | 0.0007829 |
| CDYL     | 6.31E-04 | C9orf128  | 8.96E-04 | IQCG      | 1.13E-04 | USP1                    | 0.0008624 |
| KIAA0467 | 6.38E-04 | COL9A2    | 9.86E-04 | INDO      | 1.23E-04 | TTC21A                  | 0.0008876 |
| ZC3H12A  | 8.53E-04 |           |          | FAM73A    | 1.31E-04 |                         |           |
| RING1    | 9.46E-04 |           |          | TTC21A    | 1.43E-04 |                         |           |
| PALB2    | 9.47E-04 |           |          | ZC3H12A   | 1.52E-04 |                         |           |
| ADNP     | 9.88E-04 |           |          | TRBV3-1   | 1.57E-04 |                         |           |
|          |          |           |          | RASGRP1   | 1.76E-04 |                         |           |
|          |          |           |          | C14orf161 | 2.36E-04 |                         |           |
|          |          |           |          | BIRC3     | 2.56E-04 |                         |           |
|          |          |           |          | CTLA4     | 3.11E-04 |                         |           |
|          |          |           |          | C9orf116  | 3.28E-04 |                         |           |
|          |          |           |          | GBP1      | 3.29E-04 |                         |           |
|          |          |           |          | EPHA10    | 3.93E-04 |                         |           |
|          |          |           |          | ICOS      | 4.14E-04 |                         |           |
|          |          |           |          | CPT1B     | 4.38E-04 |                         |           |
|          |          |           |          | ST3GAL5   | 4.77E-04 |                         |           |
|          |          |           |          | IL2RB     | 4.79E-04 |                         |           |
|          |          |           |          | SOCS1     | 5.00E-04 |                         |           |
|          |          |           |          | ENOSF1    | 5.23E-04 |                         |           |
|          |          |           |          | STAT1     | 5.37E-04 |                         |           |
|          |          |           |          | CD7       | 5.64E-04 |                         |           |
|          |          |           |          | IFNG      | 5.65E-04 |                         |           |
|          |          |           |          | CFB       | 5.69E-04 |                         |           |
|          |          |           |          | INDOL1    | 5.73E-04 |                         |           |
|          |          |           |          | STAT4     | 5.75E-04 |                         |           |
|          |          |           |          | PARP9     | 5.81E-04 |                         |           |
|          |          |           |          | FOXP3     | 6.31E-04 |                         |           |
|          |          |           |          | AGL       | 6.41E-04 |                         |           |
|          |          |           |          | KLRC1     | 6.46E-04 |                         |           |
|          |          |           |          | NLRC5     | 6.72E-04 |                         |           |
|          |          |           |          | GBP5      | 7.10E-04 |                         |           |
|          |          |           |          | TRPC7     | 7.18E-04 |                         |           |
|          |          |           |          | DDX5      | 7.36E-04 |                         |           |
|          |          |           |          | DAPP1     | 7.36E-04 |                         |           |
|          |          |           |          | UBASH3A   | 7.67E-04 |                         |           |
|          |          |           |          | FLJ25791  | 7.69E-04 |                         |           |
|          |          |           |          | TMEM173   | 7.82E-04 |                         |           |
|          |          |           |          | LAIR2     | 8.35E-04 |                         |           |
|          |          |           |          | SOCS6     | 8.39E-04 |                         |           |
|          |          |           |          | TYMS      | 8.49E-04 |                         |           |
|          |          |           |          | NFKBIZ    | 8.65E-04 |                         |           |
|          |          |           |          | WDR7      | 8.94E-04 |                         |           |
|          |          |           |          | TC2N      | 9.42E-04 |                         |           |
|          |          |           |          | LAG3      | 9.52E-04 |                         |           |
|          |          |           |          | JAK2      | 9.77E-04 |                         |           |
|          |          |           |          | CASP7     | 9.79E-04 |                         |           |

## SUPPLEMENTARY MATERIALS

**Supplementary Table 2.** Multivariable models for disease-free survival in the GSE14333 sample cohort without tumor stage as covariate.

|                                 | HR(95%CI)             | P value* |
|---------------------------------|-----------------------|----------|
| ZC3H12A expression <sup>§</sup> |                       |          |
| High                            | 1 [Ref]               |          |
| Low                             | 2.367 (1.145 – 4.893) | 0.020    |
| Sex                             |                       |          |
| Female                          | 1 [Ref]               |          |
| male                            | 1.110 (0.630 – 1.957) | 0.718    |
| Age increase of 1.0 year        | 0.984 (0.964 – 1.004) | 0.123    |

HR: hazard ratio; CI: confidence interval.

\* P values were derived from the Cox regression model including all variables in the table. The tests were two-sided.

§ ZC3H12A expression high or low group was the same as defined in Figure 2B.

**Supplementary Table 3.** Multivariable models for disease-free survival in the GSE14333 sample cohort including tumor stage as covariate.

|                                 | HR(95%CI)              | P value* |
|---------------------------------|------------------------|----------|
| ZC3H12A expression <sup>§</sup> |                        |          |
| High                            | 1 [Ref]                |          |
| Low                             | 1.751 (0.836 – 3.667)  | 0.137    |
| Tumor Stage <sup>ζ</sup>        |                        |          |
| A                               | 1 [Ref]                |          |
| B                               | 2.834 (0.631 – 12.733) | 0.174    |
| C                               | 7.575 (1.773 – 32.366) | 0.006    |
| Sex                             |                        |          |
| Female                          | 1 [Ref]                |          |
| male                            | 1.019 (0.573 – 1.812)  | 0.948    |
| Age increase of 1.0 year        | 0.990 (0.970 – 1.011)  | 0.363    |

HR: hazard ratio; CI: confidence interval.

\* P values were derived from the Cox regression model including all variables in the table. The tests were two-sided.

§ ZC3H12A expression high or low group was the same as defined in Figure 2B.

ζ Stage D was not included because the DFS data were not available.

## SUPPLEMENTARY MATERIALS

**Supplementary Table 4.** The top 50 most significantly correlated genes with ZC3H12A.

| Rank # | Gene    | r      | P value  | Rank # | Gene    | r       | P value  |
|--------|---------|--------|----------|--------|---------|---------|----------|
| 1      | NFKBIZ  | 0.6792 | 2.98E-31 | 26     | COL9A2  | 0.4253  | 4.04E-11 |
| 2      | CXCL2   | 0.6606 | 4.42E-29 | 27     | XDH     | 0.4221  | 5.85E-11 |
| 3      | CXCL3   | 0.6577 | 9.11E-29 | 28     | SBNO2   | 0.4135  | 1.55E-10 |
| 4      | CXCL1   | 0.6521 | 3.80E-28 | 29     | DUOX2   | 0.4131  | 1.62E-10 |
| 5      | SAA2    | 0.6043 | 2.19E-23 | 30     | COMP    | -0.4122 | 1.78E-10 |
| 6      | SAA1    | 0.5995 | 5.95E-23 | 31     | TNFAIP3 | 0.4053  | 3.82E-10 |
| 7      | SAA4    | 0.5987 | 6.97E-23 | 32     | MGP     | -0.4039 | 4.44E-10 |
| 8      | CCL20   | 0.5986 | 7.10E-23 | 33     | TNIP3   | 0.4034  | 4.70E-10 |
| 9      | SOCS1   | 0.5756 | 6.68E-21 | 34     | CCL28   | 0.4019  | 5.49E-10 |
| 10     | CEBPD   | 0.5549 | 3.01E-19 | 35     | RTEL1   | 0.4009  | 6.08E-10 |
| 11     | CFB     | 0.5503 | 6.74E-19 | 36     | LRG1    | 0.4008  | 6.16E-10 |
| 12     | LCN2    | 0.5285 | 2.69E-17 | 37     | GRP     | -0.3976 | 8.69E-10 |
| 13     | NOS2A   | 0.5238 | 5.68E-17 | 38     | PRKD1   | -0.3897 | 1.98E-09 |
| 14     | MAP3K8  | 0.5177 | 1.51E-16 | 39     | ITGBL1  | -0.3869 | 2.63E-09 |
| 15     | BCL3    | 0.5140 | 2.67E-16 | 40     | SLIT2   | -0.3853 | 3.10E-09 |
| 16     | EBF2    | 0.4772 | 5.72E-14 | 41     | MUC1    | 0.3846  | 3.33E-09 |
| 17     | SLC37A1 | 0.4647 | 3.07E-13 | 42     | ST5     | 0.3825  | 4.11E-09 |
| 18     | IL26    | 0.4587 | 6.77E-13 | 43     | CCR6    | 0.3806  | 4.98E-09 |
| 19     | PIM3    | 0.4478 | 2.71E-12 | 44     | MAP2K6  | 0.3785  | 6.16E-09 |
| 20     | VNN3    | 0.4432 | 4.76E-12 | 45     | FCRL5   | 0.3745  | 9.11E-09 |
| 21     | IKBKE   | 0.4410 | 6.20E-12 | 46     | REG3A   | 0.3727  | 1.09E-08 |
| 22     | VNN1    | 0.4341 | 1.43E-11 | 47     | CASP1   | 0.3724  | 1.12E-08 |
| 23     | IL17A   | 0.4320 | 1.84E-11 | 48     | HTR2B   | -0.3704 | 1.35E-08 |
| 24     | DUOXA2  | 0.4298 | 2.40E-11 | 49     | TRPC1   | -0.3702 | 1.38E-08 |
| 25     | CASP10  | 0.4269 | 3.36E-11 | 50     | ZFP36   | 0.3684  | 1.65E-08 |

**Supplementary Table 5.** Gene expression correlation of ZC3H12A with immune checkpoint molecules.

| Immune checkpoints | r      | P value  |
|--------------------|--------|----------|
| PD-1 (PDCD1)       | 0.2225 | 8.68E-04 |
| PD-L1 (CD274)      | 0.2091 | 1.78E-03 |

**Supplementary Table 6.** Gene expression correlation of ZC3H12A with either pro-apoptotic or anti-apoptotic genes\*.

| Pro-apoptotic gene | r       | P value | Anti-apoptotic gene | r       | P value  |
|--------------------|---------|---------|---------------------|---------|----------|
| BAD                | -0.0680 | 0.315   | BCL2A1              | -0.0397 | 0.558    |
| DEDD2              | 0.1073  | 0.112   | BCL2L1              | -0.1217 | 0.071    |
| FAS                | 0.0337  | 0.618   | BCL3                | 0.5140  | 2.67E-16 |
| RIPK2              | -0.1002 | 0.138   | BIRC3               | 0.2867  | 1.50E-05 |
|                    |         |         | RELB                | 0.0232  | 0.732    |

\* the apoptotic genes were obtained from the reference (Lu et al., Cancer Res, 2016)

## SUPPLEMENTARY MATERIALS

**Supplementary Table 7.** Gene expression correlation of ZC3H12A with proinflammatory or angiogenic genes\*.

| Proinflammatory gene | r       | P value  | Angiogenic gene | r       | P value  |
|----------------------|---------|----------|-----------------|---------|----------|
| IL6                  | 0.1154  | 0.087    | VEGFA           | 0.1821  | 6.62E-03 |
| IL8                  | 0.1124  | 0.096    | CD31            | -0.0988 | 0.124    |
| IL1B                 | 0.3055  | 3.71E-06 |                 |         |          |
| IL2                  | -0.0189 | 0.780    |                 |         |          |
| IL12B                | 0.0695  | 0.304    |                 |         |          |

\* these genes were obtained from the references (Marona et al., Cancer Res, 2017)

**Supplementary Table 8.** Predictive characteristics for ZC3H12A as stage I biomarker in colorectal cancer from the TCGA, GSE14333, and Shanghai patient cohorts.\*

| Cohort   | Platform   | Sensitivity, % | Specificity, % | Positive-predictive value, % | Negative-predictive value, % |
|----------|------------|----------------|----------------|------------------------------|------------------------------|
| TCGA     | RNA-seq    | 63.0           | 71.4           | 36.7                         | 88.0                         |
| GSE14333 | Microarray | 61.4           | 78.4           | 33.8                         | 91.9                         |
| Shanghai | rt-PCR     | 85.7           | 80.6           | 23.1                         | 98.8                         |
|          | IHC        | 85.7           | 66.0           | 14.6                         | 98.6                         |

\*The expression cutoff was derived by receiver operating characteristic curves with Youden's index.

SUPPLEMENTARY MATERIALS

Supplementary Figure 1

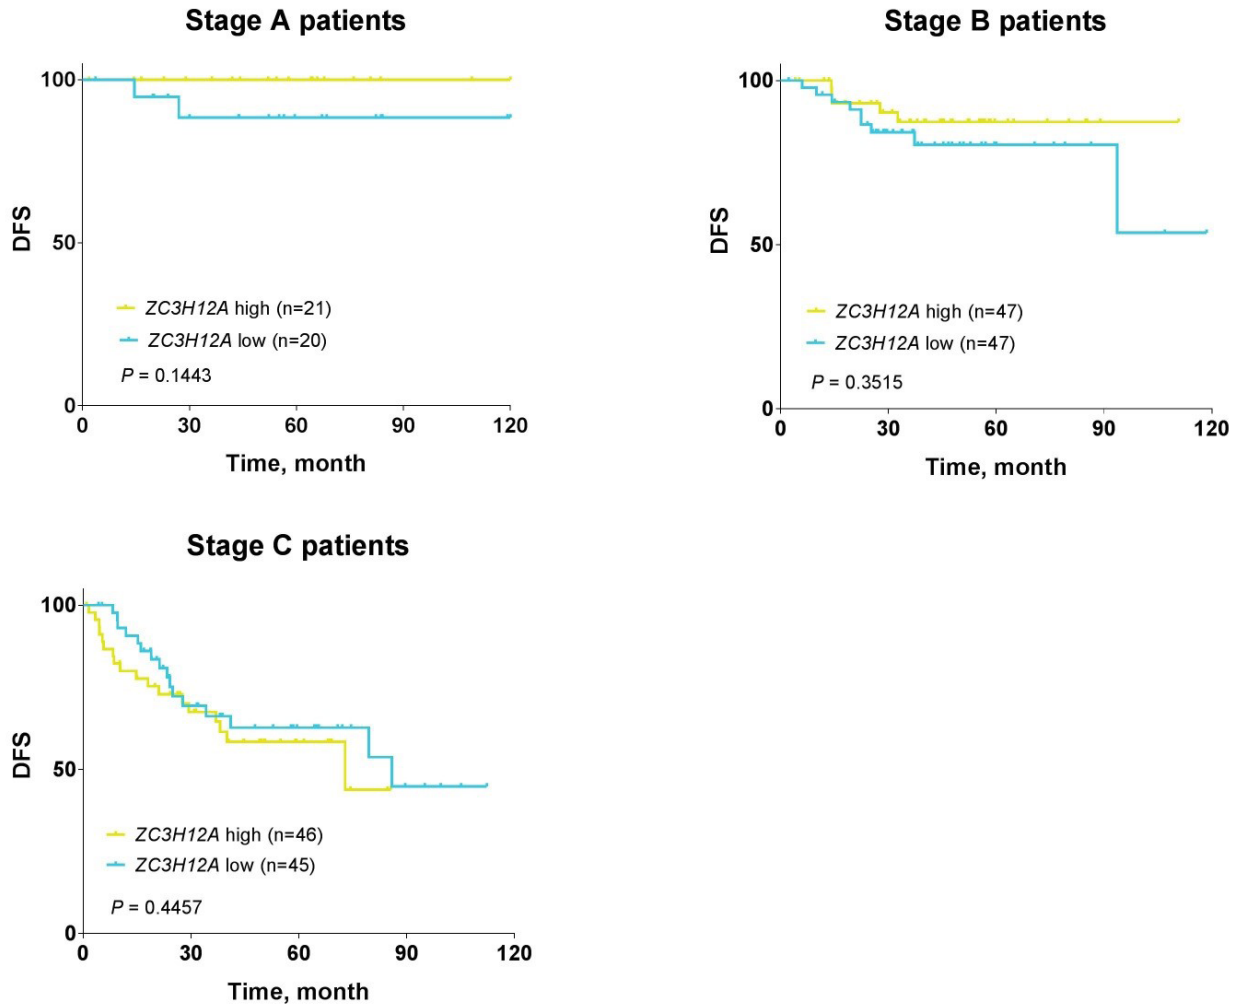

**Supplementary Figure 1. Correlation of ZC3H12A mRNA expression with disease-free survival within stage A, or B, or C patients, separately, in the validation cohort (GSE14333).** Patients were stratified into either high or low group based on ZC3H12A median expression in each category. The DFS data were not available for the stage D patients.

SUPPLEMENTARY MATERIALS

Supplementary Figure 2

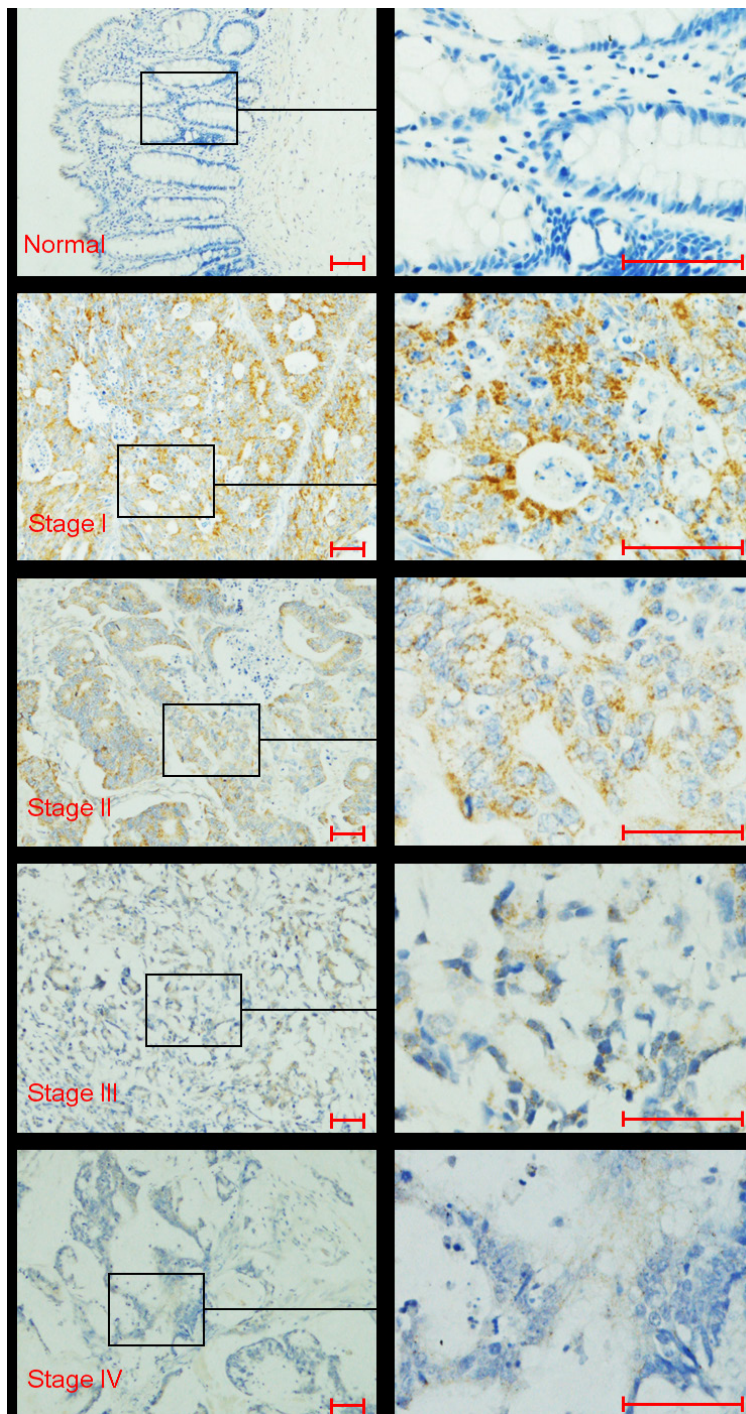

Supplementary Figure 2. An enlarger version of the panel Fig. 4B is shown for the purpose of clarity.

SUPPLEMENTARY MATERIALS

Supplementary Figure 3

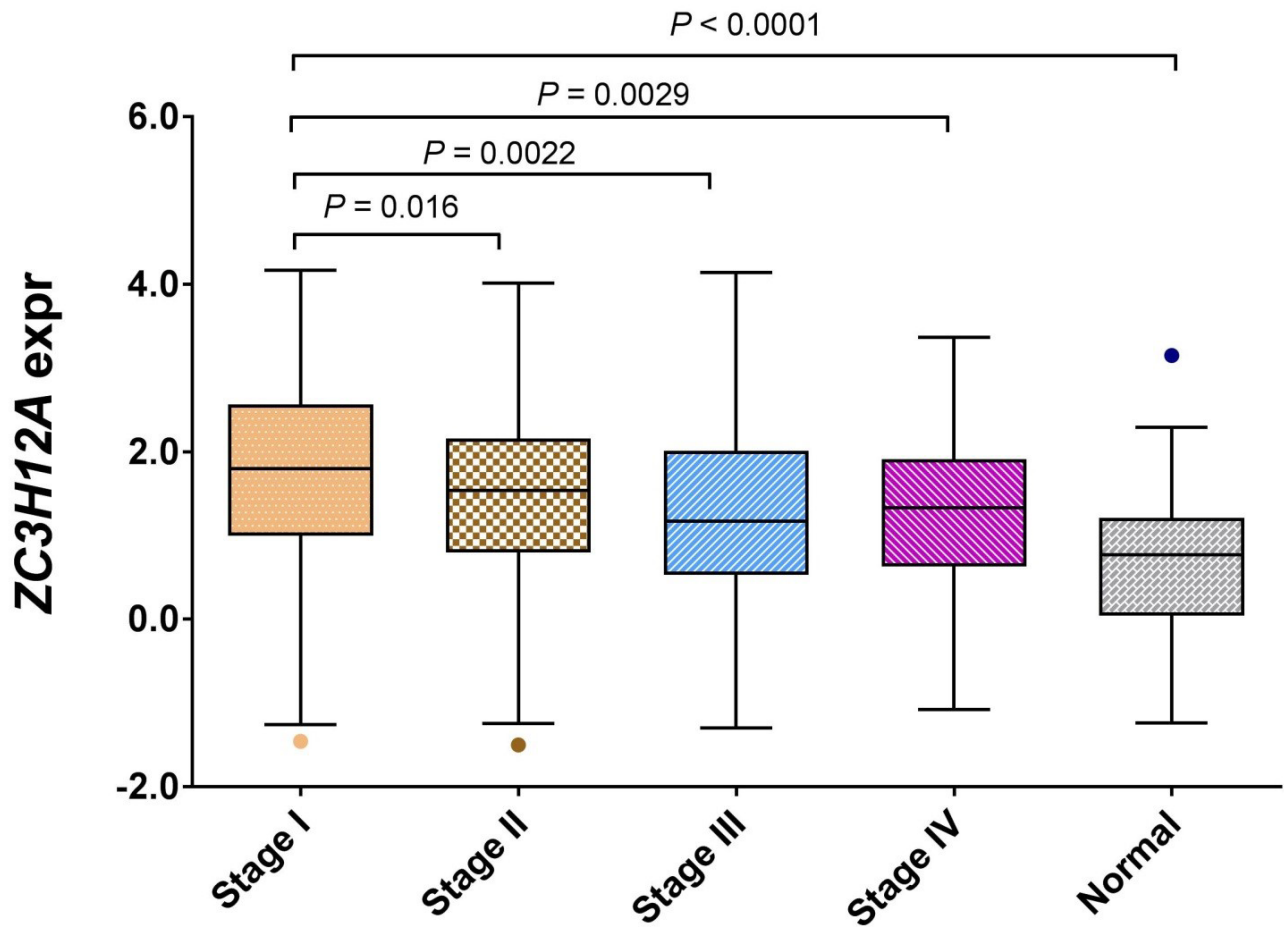

Supplementary Figure 3. Comparison of ZC3H12A mRNA expression among normal samples and CRC tumor samples at different stages. Data were presented in the bar-and-whiskers plots (center line, median; box limits, upper and lower quartiles; whiskers 1.5 x interquartile range; and points, outliers).
